# Supplementary material for: Identification of Regulatory Host Genes Involved in Sigma Virus Replication Using RNAi Knockdown in Drosophila
Source: MDPI journal article supplement (doi:10.3390/insects10100339), 2019-10-11
Supplement: s1 [file s1]

## Identification of regulatory host genes involved in sigma virus replication using RNAi knockdown in *Drosophila*

### Supplementary Figure 1.

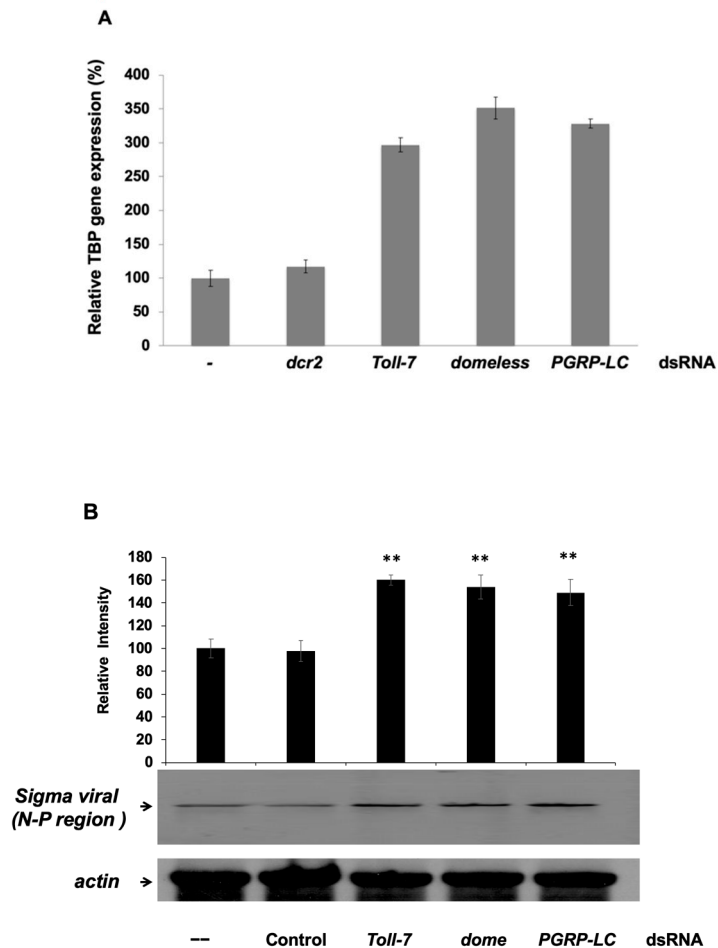

### Figure S1. Gene expression of TBP increased after knocking down three upstream immune genes.

(A) TBP expression increased after knocking down *Toll-7*, *domeless*, and *PGRP-LC* but not *dicer-2* in the transfected S2 cells. We set the untreated group as 100% expression. (B) RNA samples were subjected to Northern analysis by a full-length probe generated from the *N-P* gene fragment. The replication of viral genome in the dsRNA injected flies were probed. Actin signal were used as a loading control. We set the dsControl group as 100% expression. A dsRNA targeting *gfp* gene was used as the negative control and designated dsControl. Mean and SD shown, \*\*  $p < 0.005$  one sample t test. All experiments were performed with three biological replicates.
